# Supplementary material for: Photodynamic therapy with mitochondria-targeted biscyclometallated Ir(iii) complexes. Multi-action mechanism and strong influence of the cyclometallating ligand
Source: Royal Society of Chemistry journal article supplement (doi:10.1039/d1dt03080a), 2021-10-14
Supplement: d1dt03080a1.pdf [file d1dt03080a1.pdf]

# Supporting Information

## Photodynamic Therapy with Mitochondria-targeted Biscyclometalated Ir(III) Complexes. Multi-action Mechanism and Strong influence of the Cyclometallating Ligand

Elisenda Zafon,<sup>#a</sup> Igor Echevarría,<sup>#b</sup> Sílvia Barrabés,<sup>a</sup> Blanca R. Manzano,<sup>c</sup> Félix A. Jalón,<sup>c</sup> Ana M. Rodríguez,<sup>d</sup> Anna Massagué,<sup>\*a</sup> and Gustavo Espino<sup>\*b</sup>

<sup>a</sup>*Universitat de Girona, Departament de Biologia, Facultat de Ciències, Maria Aurelia Capmany 40, 17003 Girona, Spain.*

<sup>b</sup>*Universidad de Burgos, Departamento de Química, Facultad de Ciencias, Plaza Misael Bañuelos s/n, 09001, Burgos, Spain.*

<sup>c</sup>*Universidad de Castilla-La Mancha, Departamento de Química Inorgánica, Orgánica y Bioquímica. Facultad de Químicas, Avda. Camilo J. Cela 10, 13071 Ciudad Real, Spain.*

<sup>d</sup>*Universidad de Castilla-La Mancha, Departamento de Química Inorgánica, Orgánica y Bioquímica. Escuela Técnica Superior de Ingenieros Industriales de Ciudad Real, Avda. Camilo J. Cela, 2, 13071 Ciudad Real, Spain*

\* Corresponding authors. Emails: [anna.massagué@udg.edu](mailto:anna.massagué@udg.edu); [gespino@ubu.es](mailto:gespino@ubu.es).

### Table of Contents

|                                                                                    |    |
|------------------------------------------------------------------------------------|----|
| 1.- Synthesis and characterization of the ligands                                  | 2  |
| 2.- Synthesis and characterization of the Ir(III)-complexes                        | 6  |
| 3.- X-Ray diffraction. Crystallographic parameters                                 | 18 |
| 4.- Photostability of the Iridium complexes                                        | 20 |
| 5.- CV of the Ir(III) complexes                                                    | 22 |
| 6. UV-Vis spectra                                                                  | 23 |
| 6.- Determination of the ability for the generation of <sup>1</sup> O <sub>2</sub> | 23 |
| 7.- Photo-oxidation of NADH                                                        | 24 |

## 1.- Synthesis and characterization of the ligands

### Synthesis of L1

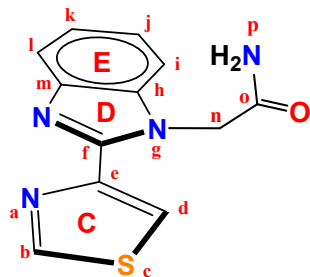

In a 100 mL Schlenk flask,  $K_2CO_3$  (0.3288 g, 1.990 mmol) was added to a solution of 2-(4-Thiazolyl)benzimidazole (thiabenzazole, TBZ) (0.4008 g, 1.992 mmol) in DMF (11 mL). The mixture/suspension was stirred at room temperature for 30 minutes. 2-bromoacetamide (0.2748 g, 1.992 mmol) was then added. The stirring was extended for 22 hours at room temperature. The solvent was removed under vacuum and the residue was redissolved in DMSO (5 mL). Water (10 mL) was added to precipitate a white solid that was filtrated, redissolved in ethanol (15 ml) and took to dryness (2 times) and then redissolved in toluene (15 ml) and took to dryness. The white solid was dried under vacuum. Yield: 0.3848 g (1.490 mmol, 75%).  $M_r$  ( $C_{12}H_{10}N_4OS$ ) = 258.30 g/mol. **Anal. Calcd for  $C_{12}H_{10}N_4OS((CH_3)_2SO)_{0.15}$ :** C 54.71; H 4.07; N 20.75; **Found:** C 54.45; H 3.87; N 21.10.  **$^1H$  NMR (400 MHz, DMSO- $d_6$ , 25 °C)**  $\delta$  9.30 (dd,  $J = 2.1, 0.6$  Hz, 1H,  $H^d$ ), 8.51 (dd,  $J = 2.1, 0.6$  Hz, 1H,  $H^b$ ), 7.69-7.66(m, 2H,  $H^p, H^i$ ), 7.55 – 7.48 (m, 1H,  $H^l$ ), 7.29 – 7.22 (m, 2H,  $H^j, H^k$ ), 7.20 (s, 1H,  $H^p$ ), 5.46 (s, 2H,  $H^n, H^n$ ) ppm.  **$^{13}C\{^1H\}$  NMR (101 MHz, DMSO- $d_6$ , 25 °C)**  $\delta$  168.76, 155.14, 147.17, 146.93, 142.33, 136.39, 122.66, 122.21, 122.13, 118.89, 110.54, 47.07 ppm. **FT-IR (KBr,  $cm^{-1}$ ) selected bands:** 3305 (w,  $\nu_{N-H}$ ), 3099 (w,  $\nu_{Car-H}$ ), 1603-1573 (m,  $\nu_{C=C+C-N}$ ), 1421 (w,  $\nu_{C=N}$ ), 1164 (m,  $\nu_{C-C}$ ), 1072 (m,  $\delta_{C-Hip}$ ), 735 (vs,  $\delta_{C-Hoop}$ ). **HR ESI+ MS (DCM/DMSO, 4:1):**  $m/z_{exp} = 259.0651$  ( $m/z_{calcd} [M+H^+] = m/z_{calcd} [C_{12}H_{11}N_4OS]^+ = 259.0654$ ). **Solubility:** soluble in dichloromethane, methanol, chloroform, dimethylformamide, dimethyl sulfoxide and acetone. Partially soluble in water.

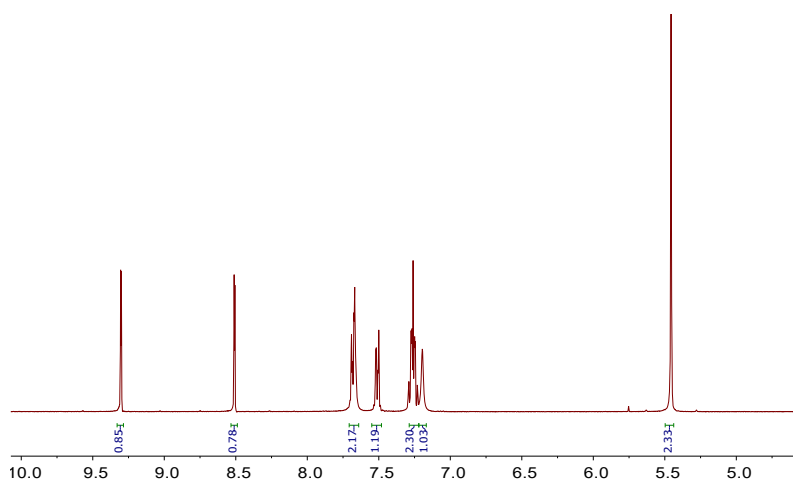

Figure S11.  $^1H$  NMR (400 MHz, DMSO- $d_6$ , 25 °C) spectrum of L1.

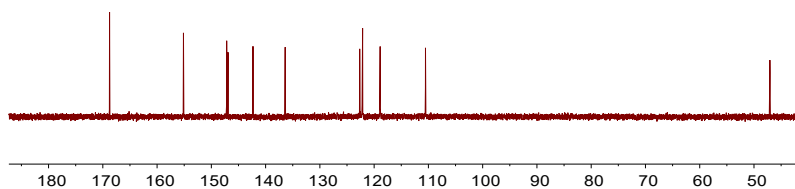

**Figure SI2.**  $^{13}\text{C}\{^1\text{H}\}$  NMR (101 MHz,  $\text{DMSO-d}_6$ , 25 °C) spectrum of **L1**.

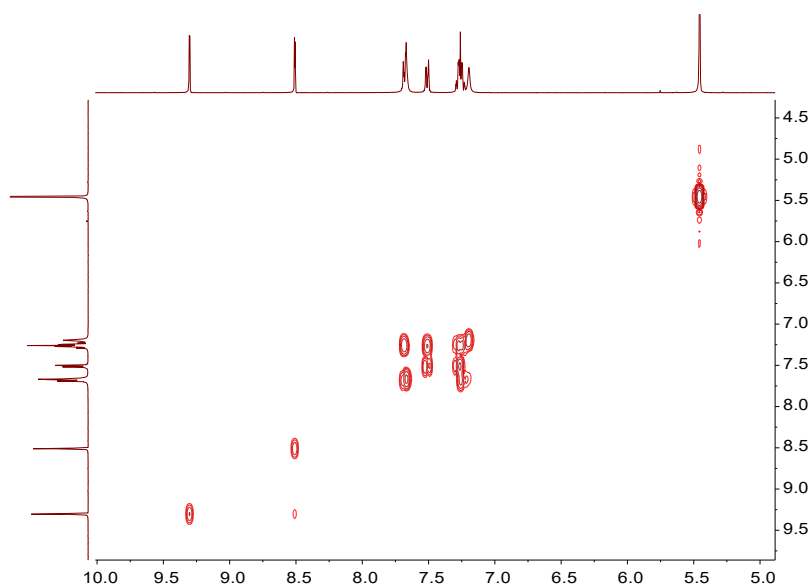

**Figure SI3.** COSY NMR (400 MHz,  $\text{DMSO-d}_6$ , 25 °C) spectrum of **L1**.

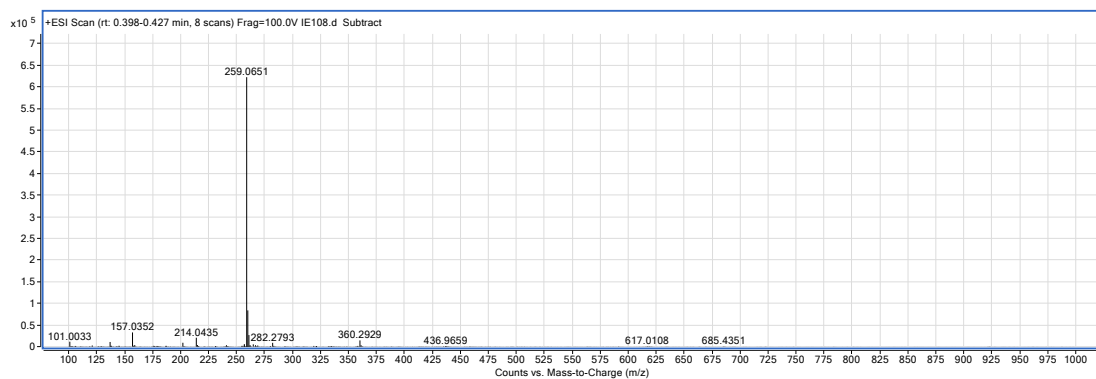

**Figure SI4.** HR ESI+ MS ( $\text{DCM/DMSO}$ , 4:1) spectrum of **L1**.

**Fi**

## Synthesis of L2

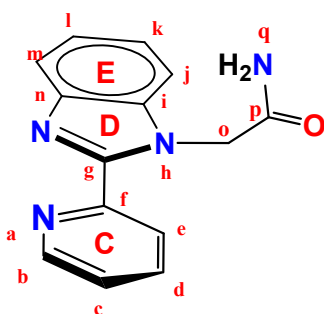

In a 100 mL Schlenk flask,  $K_2CO_3$  (0.4236 g, 2.564 mmol) was added to a solution of 2-(2-Pyridyl)benzimidazole (pybzim) (0.5001 g, 2.562 mmol) in DMF (7 mL). The mixture/suspension was stirred at room temperature for 30 minutes. 2-bromoacetamide (0.4241 g, 3.074 mmol) was then added. The stirring was extended for 22 hours at room temperature. The solvent was removed under vacuum and the residue was tried to redissolve with ethanol (15 mL), dichloromethane (15 mL) and methanol (10 mL), which is not possible, but while there is a white-yellow solid, the solution is brown-orange coloured so it is filtered and the solid is washed with water (3 mL). The pale brown solid is dried under vacuum. Yield: 0.5007 g (1.985 mmol, 77%).  $M_r$  ( $C_{14}H_{12}N_4O$ ) = 252.27 g/mol. **Anal. Calcd for  $C_{14}H_{12}N_4O((CH_3)_2SO)_{0.15}$ :** C 65.06; H 4.93; N 21.22; **Found:** C 65.05; H 4.77; N 21.50.  $^1H$  NMR (400 MHz,  $DMSO-d_6$ , 25 °C)  $\delta$  8.70 – 8.65 (m, 1H, H<sup>e</sup>), 8.38 – 8.32 (m, 1H, H<sup>b</sup>), 7.99 (td, J = 7.9, 1.8 Hz, 1H, H<sup>c</sup>), 7.73 (dd, J = 7.0, 1.5 Hz, 1H, H<sup>m</sup>), 7.65 (s, 1H, H<sup>q</sup>), 7.59 – 7.54 (m, 1H, H<sup>j</sup>), 7.49 (ddd, J = 7.6, 4.9, 1.3 Hz, 1H, H<sup>d</sup>), 7.33 – 7.25 (m, 2H, H<sup>k</sup>, H<sup>l</sup>), 7.15 (s, 1H, H<sup>q</sup>), 5.54 (s, 2H, H<sup>o</sup>) ppm.  $^{13}C\{^1H\}$  NMR (101 MHz,  $DMSO-d_6$ , 25 °C)  $\delta$  169.04, 150.13, 149.60, 148.56, 141.97, 137.36, 137.29, 124.16, 123.93, 123.18, 122.34, 119.42, 110.73, 47.71 ppm. **FT-IR (KBr,  $cm^{-1}$ ) selected bands:** 3317 (w,  $\nu_{N-H}$ ), 3147 (w,  $\nu_{Car-H}$ ), 1593-1584 (m,  $\nu_{C=C+C-N}$ ), 1415 (w,  $\nu_{C=N}$ ), 1171 (m,  $\nu_{C-C}$ ), 1045 (m,  $\delta_{C-Hip}$ ), 748 (vs,  $\delta_{C-Hoop}$ ). **HR ESI+ MS (DCM/DMSO, 4:1):**  $m/z_{exp} = 253.1087$  ( $m/z_{calcd} [M+H^+] = m/z_{calcd} [C_{14}H_{13}N_4O]^+ = 253.1089$ ). **Solubility:** soluble in dichloromethane, methanol, chloroform, dimethylformamide, dimethyl sulfoxide and acetone. Partially soluble in water.

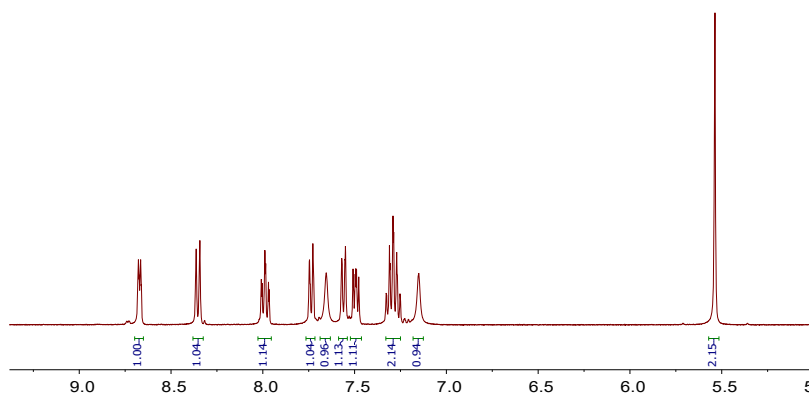

Figure S15.  $^1H$  NMR (400 MHz,  $DMSO-d_6$ , 25 °C) spectrum of L2.

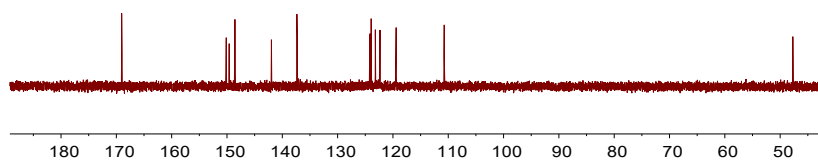

**Figure S16.**  $^{13}\text{C}\{^1\text{H}\}$  NMR (101 MHz,  $\text{DMSO-d}_6$ , 25 °C) spectrum of **L2**.

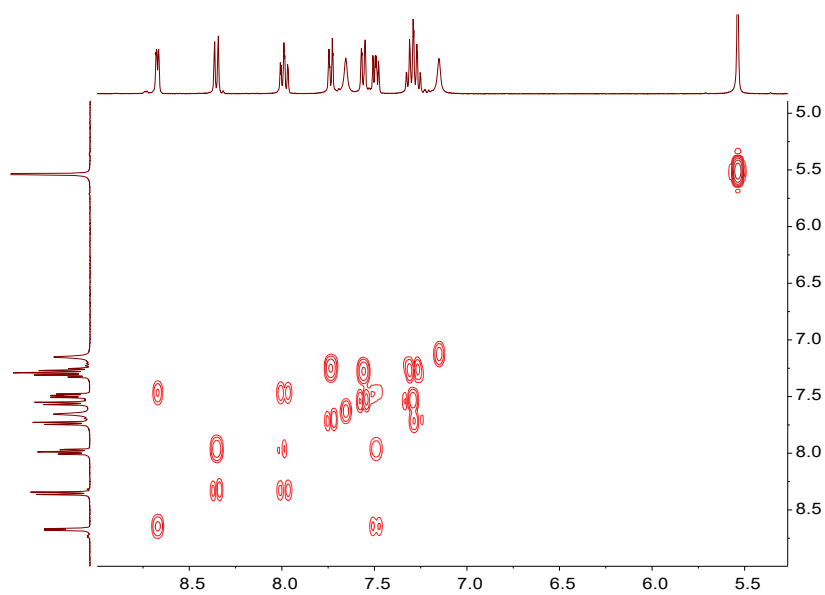

**Figure S17.**  $^1\text{H},^1\text{H}$ -COSY NMR (400 MHz,  $\text{DMSO-d}_6$ , 25 °C) spectrum of **L2**.

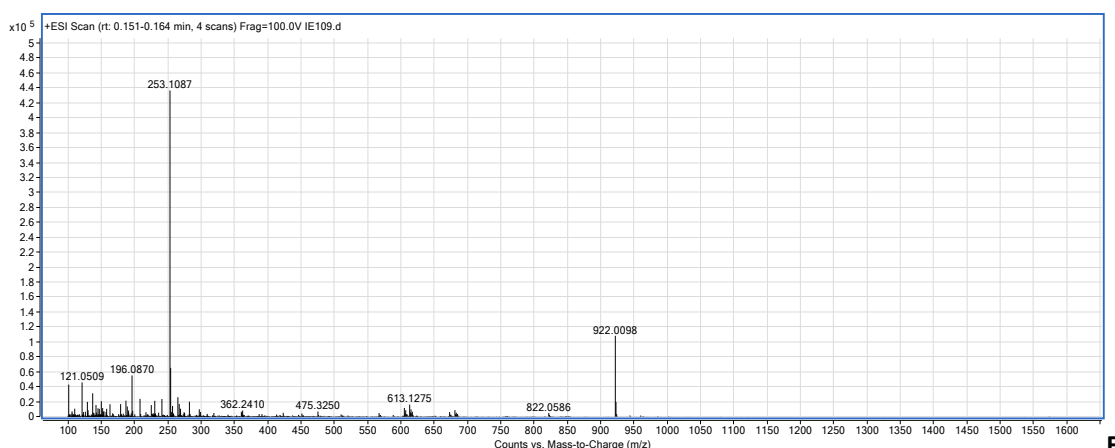

figure S18. HR ESI+ MS (DCM/DMSO, 4:1) spectrum of L2.

## 2.- Synthesis and characterization of the Ir(III)-complexes

### Synthesis of $[\text{Ir}(\text{ppy})_2(\text{L1})]\text{Cl}$ : [1a]Cl

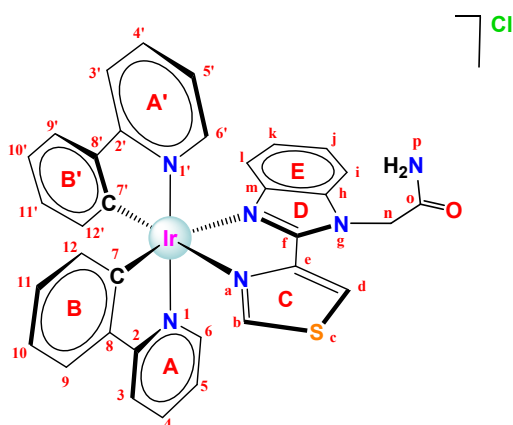

In a 100 mL Schlenk flask, previously purged with nitrogen, the ancillary ligand  $\text{L}^x$  (0.0542 g, 0.210 mmol) was added to a solution of  $[\text{Ir}(\mu\text{-Cl})(\text{ppy})_2]_2$  (0.1003 g, 0.094 mmol) in a mixture of dichloromethane (8 mL) / methanol (10 mL), and the mixture was stirred at 60 °C for 24 hours under a  $\text{N}_2$  atmosphere. The resulting solution was concentrated to half the volume under vacuum and diethyl ether (15 mL) was added to precipitate a crude solid that was isolated by filtration and washed with diethyl ether (2×5 mL). The product was dried under vacuum to produce a yellow powder. Yield: 0.1182 g (0.149 mmol, 80%).  $M_r$  ( $\text{C}_{34}\text{H}_{26}\text{ClIrN}_6\text{OS}$ ) = 794.34 g/mol. **Anal. Calcd for  $\text{C}_{34}\text{H}_{26}\text{ClIrN}_6\text{OS}(\text{CH}_2\text{Cl}_2)_{1.04}$ :** C 47.68; H 3.21; N 9.52; **Found:** C 47.70; H 3.30; N 9.32.  $^1\text{H NMR}$  (400 MHz,  $\text{DMSO-d}_6$ , 25 °C)  $\delta$  8.97 (s, 1H,  $\text{H}^d$ ), 8.51 (s, 1H,  $\text{H}^b$ ), 8.31 (s, 1H,  $\text{H}^{\text{NH}}$ ), 8.26 (d,  $J = 8.1$  Hz, 1H,  $\text{H}^3$ ), 8.21 (d,  $J = 8.0$  Hz, 1H,  $\text{H}^3$ ), 7.96 – 7.86 (m, 5H,  $\text{H}^i$ ,  $\text{H}^4$ ,  $\text{H}^4$ ,  $\text{H}^9$ ,  $\text{H}^9$ ), 7.73 (d,  $J = 5.8$  Hz, 1H,  $\text{H}^6$ ), 7.70 (d,  $J = 5.8$  Hz, 1H,  $\text{H}^6$ ), 7.64 (s, 1H,  $\text{H}^{\text{NH}}$ ), 7.36 (t,  $J = 7.8$  Hz, 1H,  $\text{H}^j$ ), 7.19 (t,  $J = 6.8$  Hz, 1H,  $\text{H}^5$ ), 7.13 (t,  $J = 6.1$  Hz, 1H,  $\text{H}^5$ ), 7.06 (t,  $J = 7.2$  Hz, 1H,  $\text{H}^{10}$ ), 7.01 (t,  $J = 7.5$  Hz, 2H,  $\text{H}^{10}$ ,  $\text{H}^k$ ), 6.92 (t,  $J = 7.6$  Hz, 1H,  $\text{H}^{11}$ ), 6.89 (t,  $J = 7.5$  Hz, 1H,  $\text{H}^{11}$ ), 6.32 (d,  $J = 7.5$  Hz, 1H,  $\text{H}^{12}$ ), 6.25 (d,  $J = 7.5$  Hz, 1H,  $\text{H}^{12}$ ), 6.15 (d,  $J = 8.2$  Hz, 1H,  $\text{H}^l$ ), 5.64 – 5.52 (AB system, 2H,  $\text{H}^n$ ) ppm.  $^{13}\text{C}\{^1\text{H}\}$  NMR (101 MHz,  $\text{DMSO-d}_6$ , 25 °C)  $\delta$  167.12, 167.00, 158.58, 149.23, 148.86, 148.46, 147.30, 144.55, 144.42, 143.31, 138.63, 138.57, 138.43, 136.27, 131.73, 131.27, 129.85, 129.53, 126.07, 125.06, 124.86, 124.75, 124.40, 123.65, 122.06, 121.98, 119.86, 119.50, 116.61, 112.20, 47.30 ppm. **FT-IR (KBr,  $\text{cm}^{-1}$ ) selected bands:** 3319 (w,  $\nu_{\text{N-H}}$ ), 3038 (w,  $\nu_{\text{C-H}}$ ), 1604–1581 (m,  $\nu_{\text{C=C} + \text{C-N}}$ ), 1426 (w,  $\nu_{\text{C=N}}$ ), 1161 (m,  $\nu_{\text{C-C}}$ ), 1062 (m,  $\delta_{\text{C-Hip}}$ ), 754–739 (vs,  $\delta_{\text{C-Hoop}}$ ). **HR ESI+ MS (DCM/DMSO, 4:1):**  $m/z_{\text{exp}} = 759.1513$  ( $m/z_{\text{calcd}} [\text{M}^+] = m/z_{\text{calcd}} [\text{C}_{34}\text{H}_{26}\text{IrN}_6\text{OS}]^+ = 759.1518$ );

501.0935 ( $m/z_{\text{calcd}} [M^+-L1] = m/z_{\text{calcd}} [C_{22}H_{16}IrN_2]^+ = 501.0943$ ). **Solubility:** soluble in dimethyl sulfoxide, dichloromethane, methanol, acetonitrile, acetone, dimethylformamide, tetrahydrofuran. Partially soluble in water.

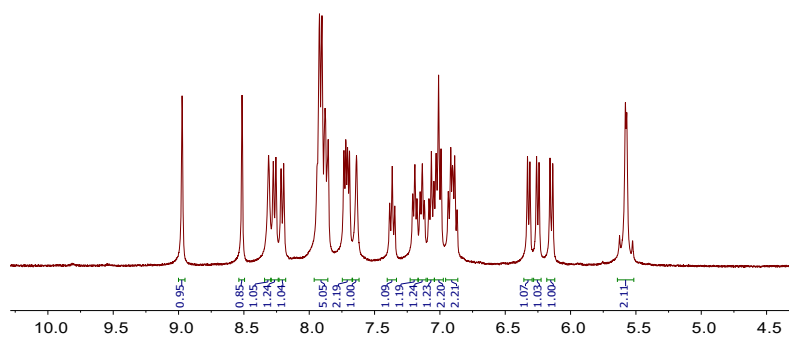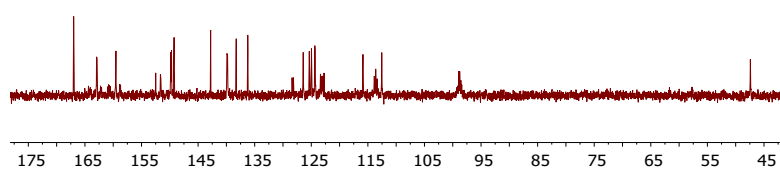

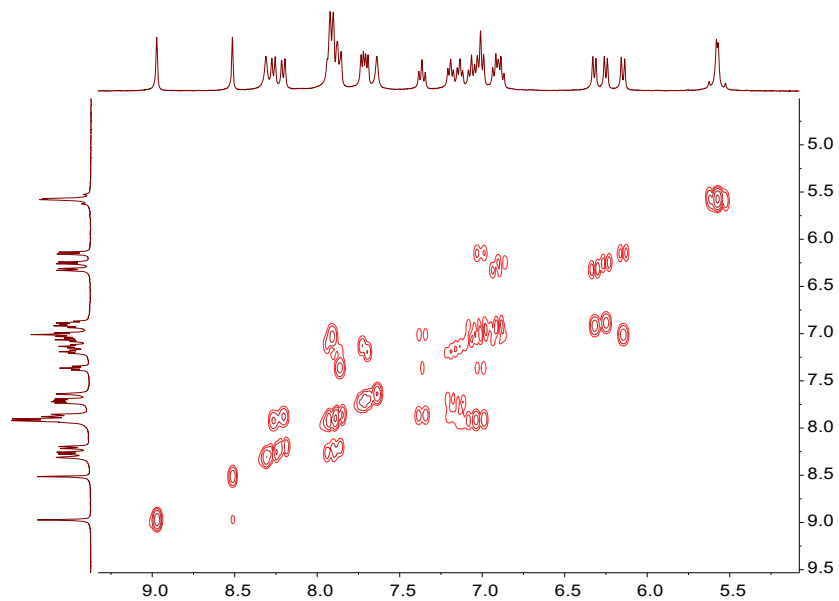

**Figure SI11.**  $^1\text{H}, ^1\text{H}$ -COSY NMR (400 MHz,  $\text{DMSO-d}_6$ , 25 °C) spectrum of **[1a]Cl**.

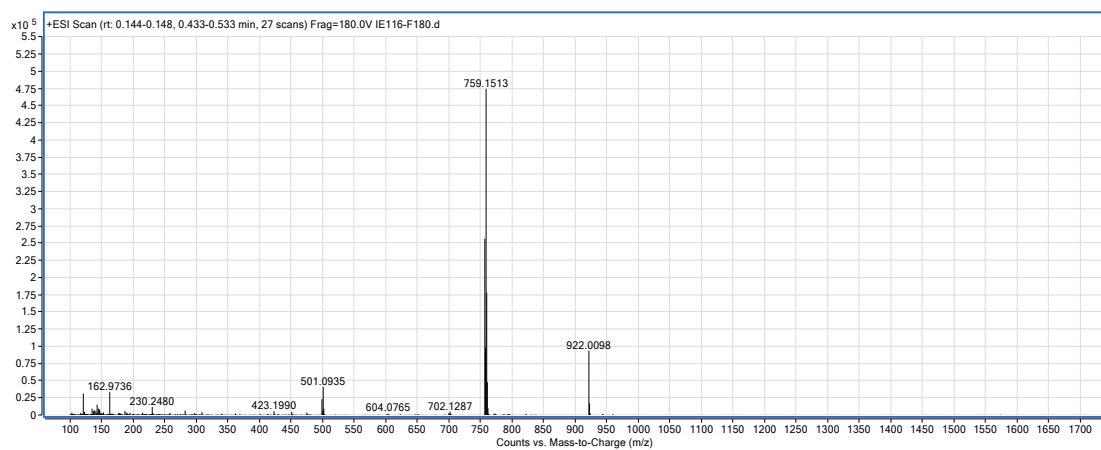

**Figure SI12.** HR ESI+ MS (DCM/DMSO, 4:1) spectrum of **[1a]Cl**.



## Synthesis of $[\text{Ir}(\text{dfppy})_2(\text{L}1)]\text{Cl}$ : **[1b]Cl**

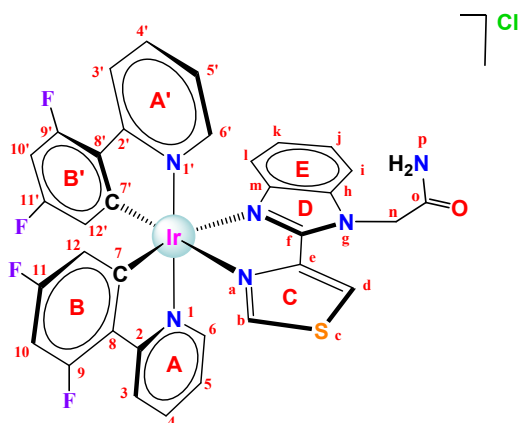

In a 100 mL Schlenk flask, previously purged with nitrogen, the ancillary ligand  $\text{L}^x$  (0.0473 g, 0.183 mmol) was added to a solution of  $[\text{Ir}(\mu\text{-Cl})(\text{dfppy})_2]_2$  (0.1001 g, 0.082 mmol) in a mixture of dichloromethane (8 mL) / methanol (10 mL), and the mixture was stirred at 60 °C for 24 hours under a  $\text{N}_2$  atmosphere. The resulting solution was concentrated to half the volume under vacuum and diethyl ether (15 mL) was added to precipitate a crude solid that was isolated by filtration and washed with diethyl ether (2x5 mL). The product was dried under vacuum to produce a yellow powder. Yield: 0.0848 g (0.098 mmol, 60%).  **$\text{M}_r$**  ( $\text{C}_{34}\text{H}_{22}\text{ClF}_4\text{IrN}_6\text{OS}$ ) = 866.31 g/mol. **Anal. Calcd for  $\text{C}_{34}\text{H}_{22}\text{ClF}_4\text{IrN}_6\text{OS} \cdot (\text{CH}_2\text{Cl}_2)_{0.90}$** : C 44.46; H 2.54; N 8.91; **Found**: C 44.54.49; H 2.60; N 9.20.  **$^1\text{H NMR}$  (400 MHz,  $\text{DMSO-d}_6$ , 25 °C)**  $\delta$  9.01 (s, 1H,  $\text{H}^{\text{d}}$ ), 8.73 (s, 1H,  $\text{H}^{\text{b}}$ ), 8.30 (d,  $J = 7.6$  Hz, 1H,  $\text{H}^{\text{3}}$ ), 8.29 (s, 1H,  $\text{H}^{\text{NH}}$ ), 8.24 (d,  $J = 8.7$  Hz,  $\text{H}^{\text{3'}}$ ), 8.03 (t,  $J = 8.1$  Hz, 1H,  $\text{H}^{\text{4}}$ ), 7.99 (t,  $J = 8.1$  Hz, 1H,  $\text{H}^{\text{4'}}$ ), 7.91 (d,  $J = 8.3$  Hz, 1H,  $\text{H}^{\text{i}}$ ), 7.79 (d,  $J = 5.8$  Hz, 1H,  $\text{H}^{\text{6}}$ ), 7.75 (d,  $J = 5.7$  Hz, 1H,  $\text{H}^{\text{6'}}$ ), 7.65 (s, 1H,  $\text{H}^{\text{NH}}$ ), 7.42 (t,  $J = 7.9$  Hz, 1H,  $\text{H}^{\text{i}}$ ), 7.28 (t,  $J = 6.8$  Hz, 1H,  $\text{H}^{\text{5}}$ ), 7.24 (t,  $J = 6.8$  Hz, 1H,  $\text{H}^{\text{5'}}$ ), 7.18 (t,  $J = 7.7$  Hz, 1H,  $\text{H}^{\text{k}}$ ), 7.09 – 6.91 (m, 2H,  $\text{H}^{\text{10}}$ ,  $\text{H}^{\text{10'}}$ ), 6.21 (d,  $J = 8.2$  Hz, 1H,  $\text{H}^{\text{l}}$ ), 5.76 (d,  $J_{\text{H-F}} = 6.6$  Hz, 1H,  $\text{H}^{\text{12}}$  or  $\text{H}^{\text{12'}}$ ), 5.66 (d,  $J_{\text{H-F}} = 8.5$  Hz, 1H,  $\text{H}^{\text{12}}$  or  $\text{H}^{\text{12'}}$ ), 5.58 (AB system 2H,  $\text{H}^{\text{n}}$ ) ppm.  **$^{19}\text{F NMR}$  (376 MHz,  $\text{DMSO-d}_6$ , 25 °C)**  $\delta$  -107.01 (c,  $J = 9.8$  Hz, 1F,  $\text{F}^{\text{11}}$  or  $\text{F}^{\text{11'}}$ ), -107.04 (c,  $J = 9.5$  Hz, 1F,  $\text{F}^{\text{11}}$  or  $\text{F}^{\text{11'}}$ ), -109.12 (t,  $J = 11.0$  Hz, 1F,  $\text{F}^{\text{9}}$  or  $\text{F}^{\text{9'}}$ ), -109.19 (t,  $J = 11.6$  Hz, 1F,  $\text{F}^{\text{9}}$  or  $\text{F}^{\text{9'}}$ ) ppm.  **$^{13}\text{C}\{^1\text{H}\}$  NMR (101 MHz,  $\text{DMSO-d}_6$ , 25 °C)**  $\delta$  166.99, 162.93, 162.86, 161.65, 161.08, 159.50, 152.50, 151.58, 149.79, 149.24, 142.78, 139.91, 139.79, 138.26, 136.22, 128.39, 128.15, 127.57, 126.39, 125.35, 124.96, 124.34, 123.57, 123.14, 115.91, 115.82, 113.84, 112.56, 109.55, 99.19, 47.39 ppm. **FT-IR (KBr,  $\text{cm}^{-1}$ ) selected bands**: 3069 (w,  $\nu_{\text{Car-H}}$ ), 1601-1574 (m,  $\nu_{\text{C=C+C-N}}$ ), 1429 (w,  $\nu_{\text{C-N}}$ ), 1163 (m,  $\nu_{\text{C-C}}$ ), 1070 (m,  $\delta_{\text{C-Hip}}$ ), 745 (vs,  $\delta_{\text{C-Hoop}}$ ). **HR ESI+ MS (DCM/DMSO, 4:1)**:  $m/z_{\text{exp}} = 831.1136$  ( $m/z_{\text{calcd}} [\text{M}^+] = m/z_{\text{calcd}} [\text{C}_{34}\text{H}_{22}\text{F}_4\text{IrN}_6\text{OS}]^+ = 831.1141$ );  $573.0556$  ( $m/z_{\text{calcd}} [\text{M}^+ - \text{L}1] = m/z_{\text{calcd}} [\text{C}_{22}\text{H}_{12}\text{F}_4\text{IrN}_2]^+ = 573.0566$ ). **Solubility**: soluble in dimethyl sulfoxide, dichloromethane, methanol, acetonitrile, acetone, dimethylformamide, tetrahydrofuran. Partially soluble in water.

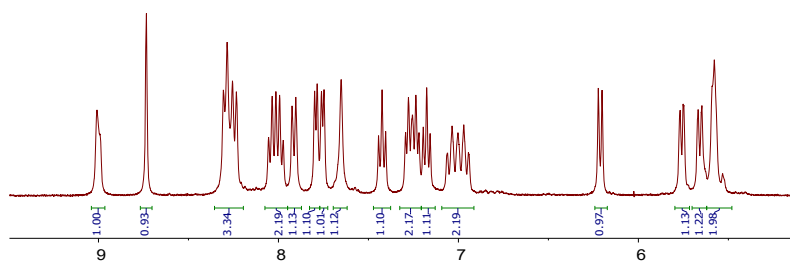

**Figure SI13.**  $^1\text{H}$  NMR (400 MHz,  $\text{DMSO-d}_6$ , 25 °C) spectrum of **[1b]Cl**.

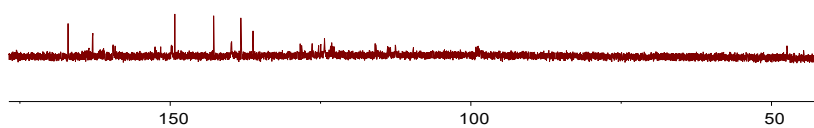

**Figure SI14.**  $^{13}\text{C}\{^1\text{H}\}$  NMR (101 MHz,  $\text{DMSO-d}_6$ , 25 °C) spectrum of **[1b]Cl**.

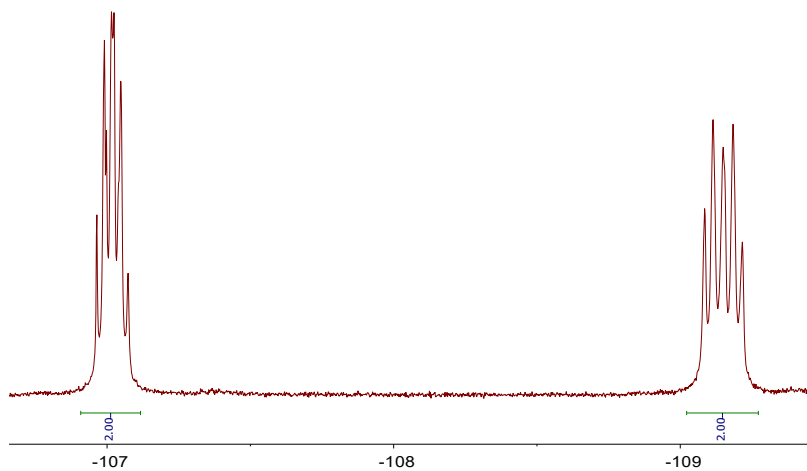

**Figure SI15.**  $^{19}\text{F}$  NMR (376 MHz,  $\text{DMSO-d}_6$ , 25 °C) spectrum of **[1b]Cl**.

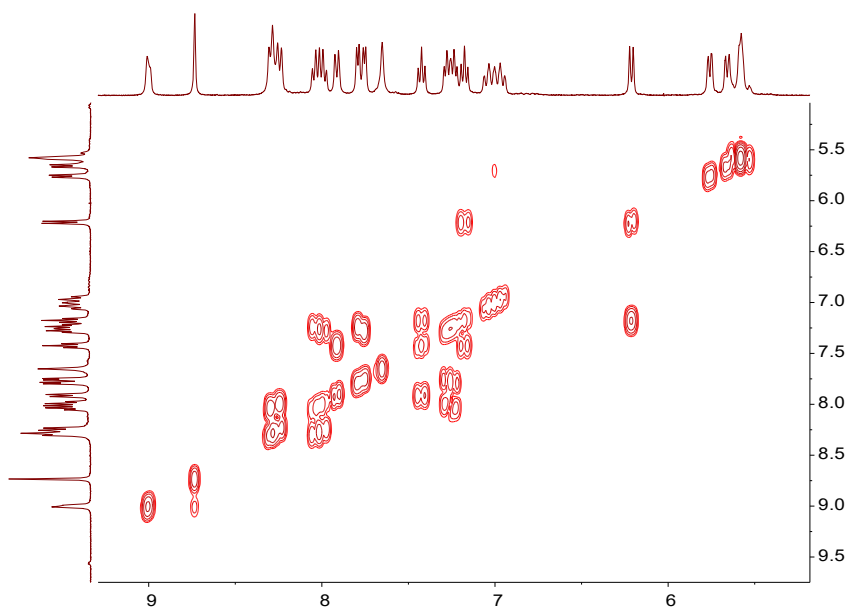

**Figure SI16.**  $^1\text{H}, ^1\text{H}$ -COSY NMR (400 MHz,  $\text{DMSO-d}_6$ , 25 °C) spectrum of **[1b]Cl**.

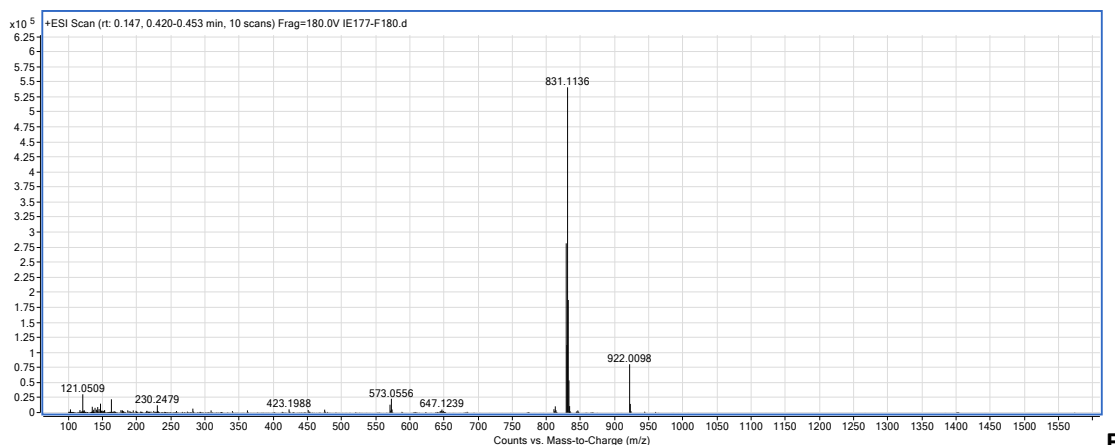

Figure S117. HR ESI+ MS (DCM/DMSO, 4:1) spectrum of [1b]Cl.

### Synthesis of [Ir(ppy)<sub>2</sub>(L2)]Cl: [2a]Cl

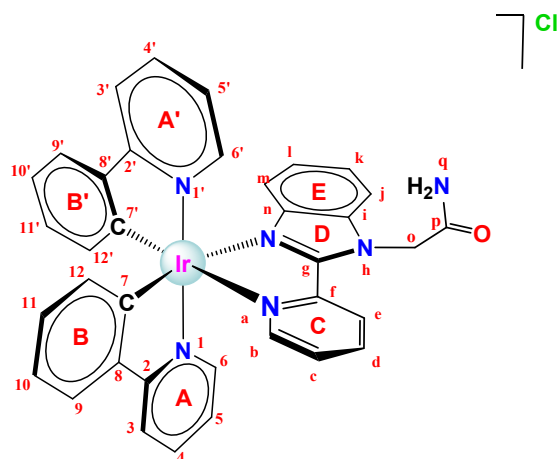

In a 100 mL Schlenk flask, previously purged with nitrogen, the ancillary ligand L<sup>x</sup> (0.0537 g, 0.213 mmol) was added to a solution of [Ir(μ-Cl)(ppy)<sub>2</sub>]<sub>2</sub> (0.1004 g, 0.094 mmol) in a mixture of dichloromethane (8 mL) / methanol (10 mL), and the mixture was stirred at 60 °C for 24 hours under a N<sub>2</sub> atmosphere. The resulting solution was concentrated to half the volume under vacuum and diethyl ether (15 mL) was added to precipitate a crude solid that was isolated by filtration and washed with diethyl ether (2×5 mL). The product was dried under vacuum to produce a orange powder. Yield: 0.1036 g (0.131 mmol, 70%). **M<sub>r</sub>** (C<sub>36</sub>H<sub>28</sub>ClIrN<sub>6</sub>O) = 788.32 g/mol. **Anal. Calcd for C<sub>36</sub>H<sub>28</sub>ClIrN<sub>6</sub>O·(CH<sub>2</sub>Cl<sub>2</sub>)<sub>0.80</sub>**: C 51.62; H 3.48; N 9.81; **Found**: C 51.64; H 3.56; N 9.78. **<sup>1</sup>H NMR (400 MHz, DMSO-d<sub>6</sub>, 25 °C)** δ 8.47 (d, J = 8.2 Hz, 1H, H<sup>e</sup>), 8.32 – 8.19 (m, 4H, H<sup>d</sup>, H<sup>3</sup>, H<sup>3'</sup>, H<sup>NH</sup>), 7.97-7.86 (m, 6H, H<sup>b</sup>, H<sup>i</sup>, H<sup>9</sup>, H<sup>9'</sup>, H<sup>4</sup>, H<sup>4'</sup>), 7.71-7.66 (m, 3H, H<sup>c</sup>, H<sup>NH</sup>, H<sup>6</sup>), 7.60 (d, J = 5.5 Hz, 1H, H<sup>6'</sup>), 7.43 (t, J = 7.8 Hz, 1H, H<sup>k</sup>), 7.16-7.01 (m, 5H, H<sup>5</sup>, H<sup>5'</sup>, H<sup>10</sup>, H<sup>10'</sup>, H<sup>l</sup>), 6.93 (t, J = 6.7 Hz, 1H, H<sup>11</sup>), 6.91 (t, J = 6.8 Hz, 1H, H<sup>11'</sup>), 6.29 (d, J = 7.3 Hz, 1H, H<sup>12</sup>), 6.22 (d, J = 7.7 Hz, 1H, H<sup>m</sup>), 6.20 (d, J = 7.0 Hz, 1H, H<sup>12'</sup>) ppm. **<sup>13</sup>C{<sup>1</sup>H} NMR (101 MHz, DMSO-d<sub>6</sub>, 25 °C)** δ 167.41, 167.09, 166.94, 153.51, 151.46, 150.99, 149.28, 149.02, 147.53, 146.90, 144.43, 144.13, 139.59, 138.67, 138.64, 138.48, 136.85, 131.76, 130.89, 130.31, 129.65, 128.67, 125.86, 125.40, 125.16, 124.89, 124.84, 123.76, 123.68, 122.26, 122.13, 119.98, 119.65, 116.99, 112.40, 48.10 ppm. **FT-IR (KBr, cm<sup>-1</sup>) selected bands**: 3310 (w, ν<sub>N-H</sub>), 3029 (w, ν<sub>Car-H</sub>), 1606-1581 (m, ν<sub>C=C + C-N</sub>), 1436 (w, ν<sub>C=N</sub>), 1143 (m, ν<sub>C-C</sub>), 1064 (m, δ<sub>C-Hip</sub>), 761-742 (vs, δ<sub>C-Hoop</sub>). **HR ESI+ MS (DCM/DMSO, 4:1)**: m/z<sub>exp</sub> = 753.1949 (m/z<sub>calcd</sub> [M<sup>+</sup>] = m/z<sub>calcd</sub> [C<sub>36</sub>H<sub>28</sub>IrN<sub>6</sub>O]<sup>+</sup> = 753.1954); 501.0934 (m/z<sub>calcd</sub> [M<sup>+</sup>-L2] = m/z<sub>calcd</sub> [C<sub>22</sub>H<sub>16</sub>IrN<sub>2</sub>]<sup>+</sup> = 501.0943). **Solubility**: soluble in dimethyl sulfoxide, dichloromethane, methanol, acetonitrile, acetone, dimethylformamide, tetrahydrofuran.

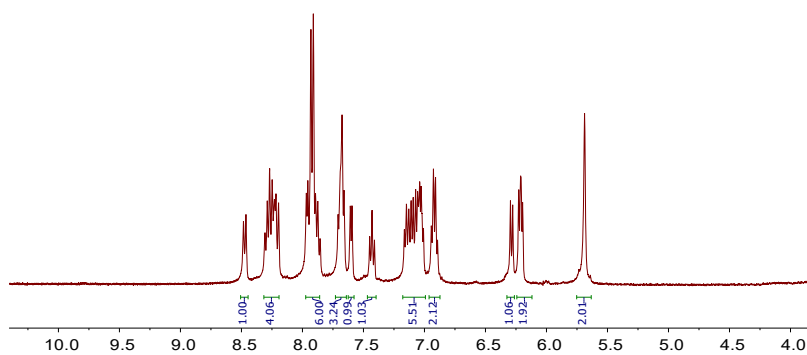

Figure S118.  $^1\text{H}$  NMR (400 MHz,  $\text{DMSO-d}_6$ , 25 °C) spectrum of [2a]Cl.

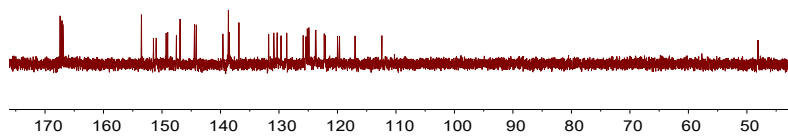

Figure S119.  $^{13}\text{C}\{^1\text{H}\}$  NMR (101 MHz,  $\text{DMSO-d}_6$ , 25 °C) spectrum of [2a]Cl.

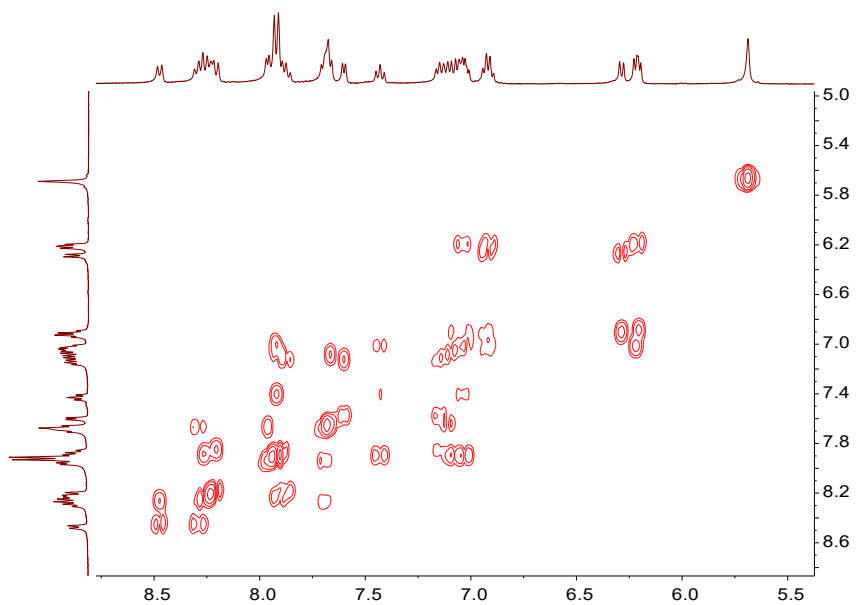

**Figure S120.**  $^1\text{H}, ^1\text{H}$ -COSY NMR (400 MHz,  $\text{DMSO-d}_6$ , 25  $^\circ\text{C}$ ) spectrum of **[2a]Cl**.

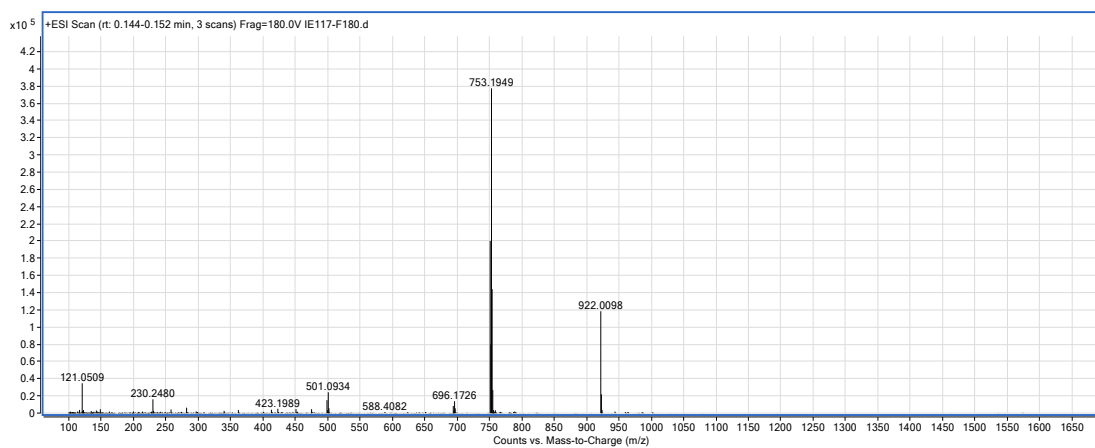

**Figure S121.** HR ESI+ MS ( $\text{DCM/DMSO}$ , 4:1) spectrum of **[2a]Cl**.

Fi

## Synthesis of $[\text{Ir}(\text{dfppy})_2(\text{L}^2)]\text{Cl}$ : $[\mathbf{2b}]\text{Cl}$

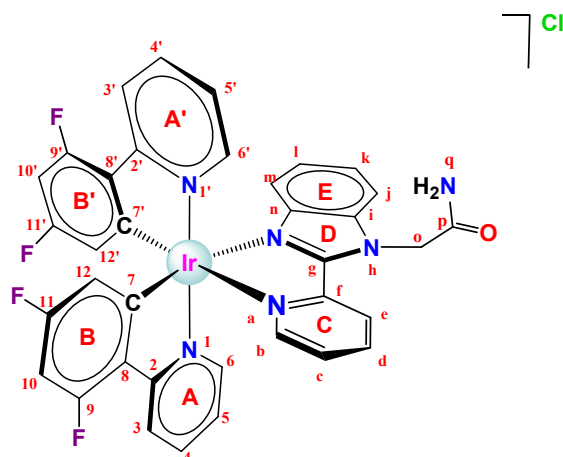

In a 100 mL Schlenk flask, previously purged with nitrogen, the ancillary ligand  $\text{L}^x$  (0.0417 g, 0.165 mmol) was added to a solution of  $[\text{Ir}(\mu\text{-Cl})(\text{dfppy})_2]_2$  (0.1002 g, 0.082 mmol) in a mixture of dichloromethane (8 mL) / methanol (10 mL), and the mixture was stirred at 60 °C for 24 hours under a  $\text{N}_2$  atmosphere. The resulting solution was concentrated to half the volume under vacuum and diethyl ether (15 mL) was added to precipitate a crude solid that was isolated by filtration and washed with diethyl ether (2×5 mL). The product was dried under vacuum to produce a yellow powder. Yield: 0.0720 g (0.084 mmol, 51%).  **$M_r$**  ( $\text{C}_{36}\text{H}_{24}\text{ClF}_4\text{IrN}_6\text{O}$ ) = 860.28 g/mol. **Anal. Calcd for  $\text{C}_{36}\text{H}_{24}\text{ClF}_4\text{IrN}_6\text{O} \cdot (\text{CH}_2\text{Cl}_2)_{1.6}$** : C 45.34; H 2.75; N 8.44; **Found**: C 45.37; H 2.80; N 8.60.  **$^1\text{H}$  NMR (400 MHz, DMSO- $d_6$ , 25 °C)**  $\delta$  8.55 (d,  $J = 6.9$  Hz, 1H,  $\text{H}^e$ ), 8.36–8.29 (m, 3H,  $\text{H}^d$ ,  $\text{H}^{\text{NH}}$ ,  $\text{H}^3$  or  $\text{H}^3'$ ), 8.24 (d,  $J = 7.9$  Hz, 1H,  $\text{H}^3$  or  $\text{H}^3'$ ), 7.99 (m, 4H,  $\text{H}^b$ ,  $\text{H}^4$ ,  $\text{H}^4'$ ,  $\text{H}^i$ ), 7.80 – 7.63 (m, 4H,  $\text{H}^c$ ,  $\text{H}^6$ ,  $\text{H}^6'$ ,  $\text{H}^{\text{NH}}$ ), 7.48 (t,  $J = 8.7$  Hz, 1H,  $\text{H}^k$ ), 7.26–7.18 (m, 3H,  $\text{H}^5$ ,  $\text{H}^l$ ,  $\text{H}^5'$ ), 7.04 (t,  $J_{\text{H-F}} = 8.7$  Hz, 1H,  $\text{H}^{10}$  or  $\text{H}^{10'}$ ), 6.98 (t,  $J_{\text{H-F}} = 8.7$  Hz, 1H,  $\text{H}^{10}$  or  $\text{H}^{10'}$ ), 6.27 (d,  $J = 8.3$  Hz, 1H,  $\text{H}^m$ ), 5.74 (m, 3H,  $\text{H}^o$ ,  $\text{H}^{12}$ ), 5.62 (d,  $J_{\text{H-F}} = 7.7$  Hz, 1H,  $\text{H}^{12'}$ ) ppm.  **$^{19}\text{F}$  NMR (376 MHz, DMSO- $d_6$ , 25 °C)**  $\delta$  -106.49 (q,  $J = 9.3$  Hz, 1F,  $\text{F}^{11}$  or  $\text{F}^{11'}$ ), -106.92 (q,  $J = 9.6$  Hz, 1F,  $\text{F}^{11}$  or  $\text{F}^{11'}$ ), -108.62 (t,  $J = 11.9$  Hz, 1F,  $\text{F}^9$  or  $\text{F}^9'$ ), -109.11 (t,  $J = 11.2$  Hz, 1F,  $\text{F}^9$  or  $\text{F}^9'$ ) ppm.  **$^{13}\text{C}\{^1\text{H}\}$  NMR (101 MHz, DMSO- $d_6$ , 25 °C)**  $\delta$  167.28, 164.23, 163.65, 162.87, 162.11, 161.69, 161.11, 159.53, 159.40, 159.23, 158.48, 155.46, 155.39, 153.53, 151.86, 151.80, 151.54, 149.76, 146.48, 140.19, 139.96, 138.27, 136.78, 129.18, 128.26, 126.08, 125.68, 124.37, 123.26, 123.09, 116.25, 113.83, 112.96, 112.77, 99.07, 48.17 ppm. **FT-IR (KBr,  $\text{cm}^{-1}$ ) selected bands**: 3065 (w,  $\nu_{\text{Car-H}}$ ), 1601–1575 (m,  $\nu_{\text{C=C+C-N}}$ ), 1429 (w,  $\nu_{\text{C=N}}$ ), 1163 (m,  $\nu_{\text{C-C}}$ ), 1069 (m,  $\delta_{\text{C-Hip}}$ ), 745 (vs,  $\delta_{\text{C-Hoop}}$ ). **HR ESI+ MS (DCM/DMSO, 4:1)**:  $m/z_{\text{exp}} = 825.1575$  ( $m/z_{\text{calcd}} [\text{M}^+] = m/z_{\text{calcd}} [\text{C}_{36}\text{H}_{24}\text{F}_4\text{IrN}_6\text{O}]^+ = 825.1577$ ); 573.0556 ( $m/z_{\text{calcd}} [\text{M}^+ - \text{L}^2] = m/z_{\text{calcd}} [\text{C}_{22}\text{H}_{12}\text{F}_4\text{IrN}_2]^+ = 573.0566$ ). **Solubility**: soluble in dimethyl sulfoxide, dichloromethane, methanol, acetonitrile, acetone, dimethylformamide, tetrahydrofuran.

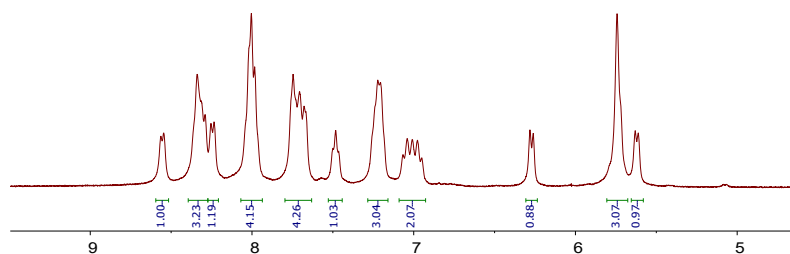

**Figure S122.**  $^1\text{H}$  NMR (400 MHz,  $\text{DMSO-d}_6$ , 25 °C) spectrum of [2b]Cl.

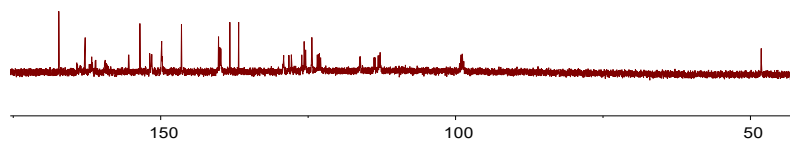

**Figure S123.**  $^{13}\text{C}\{^1\text{H}\}$  NMR (101 MHz,  $\text{DMSO-d}_6$ , 25 °C) spectrum of [2b]Cl.



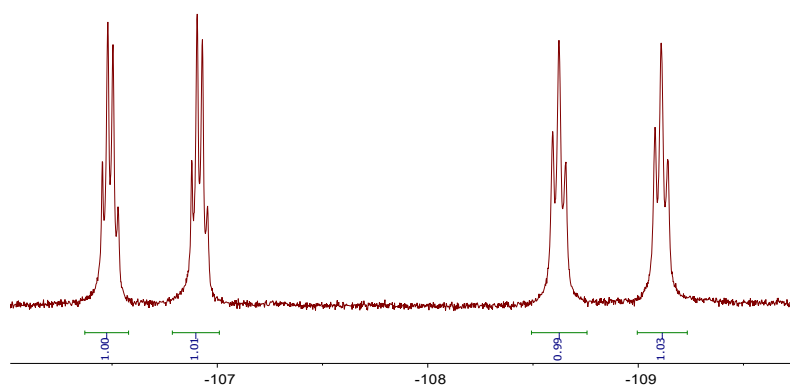

Figure S124.  $^{19}\text{F}$  NMR (376 MHz,  $\text{DMSO-d}_6$ , 25 °C) spectrum of **[2b]Cl**.

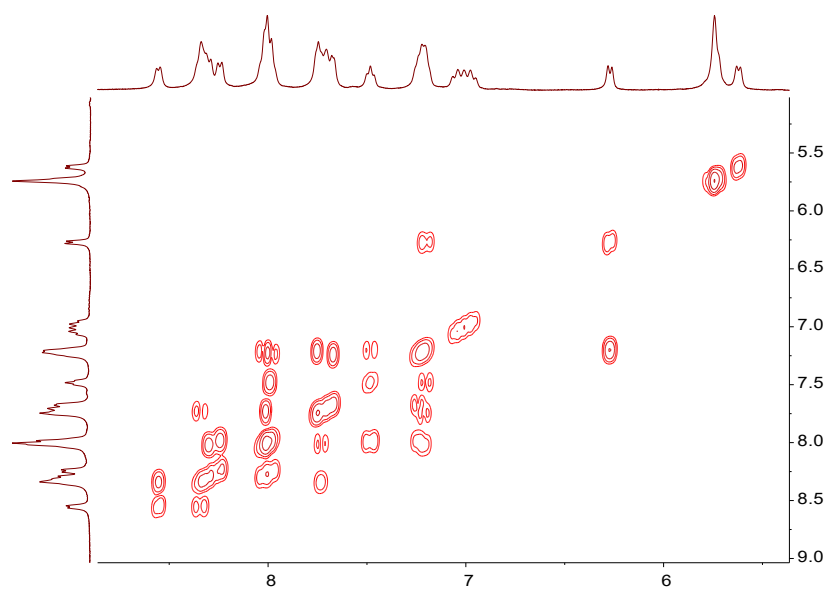

Figure S125.  $^1\text{H}$ ,  $^1\text{H}$ -COSY NMR (400 MHz,  $\text{DMSO-d}_6$ , 25 °C) spectrum of **[2b]Cl**.

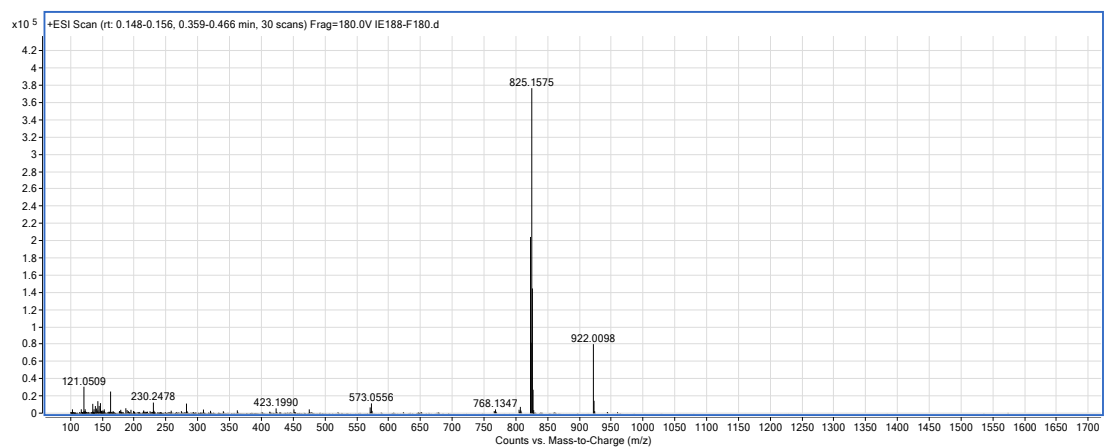

Figure S126. HR ESI+ MS ( $\text{DCM/DMSO}$ , 4:1) spectrum of **[2b]Cl**.

### 3.- X-Ray diffraction. Crystallographic parameters

**Table SI1.** Bond Lengths (Å) and Angles (°) for [1a]PF<sub>6</sub> and [2a]PF<sub>6</sub>.

| <b>[1a]PF<sub>6</sub></b> |           |                   |           |
|---------------------------|-----------|-------------------|-----------|
| <b>Bond Lengths</b>       |           | <b>Angles (°)</b> |           |
| Ir1- N3                   | 2.148(9)  | N1- Ir1- N2       | 175.0(3)  |
| Ir1- N5                   | 2.163(8)  | C22- Ir1- N5      | 172.9(4)  |
| Ir1- N1                   | 2.053(5)  | C11- Ir1- N3      | 172.7(3)  |
| Ir1- C22                  | 2.001(11) | C31- S1- C32      | 90.0(6)   |
| Ir1- N2                   | 2.052(9)  | O1- C34- C33      | 122.7(13) |
| Ir1- C11                  | 2.002(6)  | O1- C34- N6       | 121.6(13) |
| S1- C32                   | 1.700(12) | N6- C34- C33      | 115.6(13) |
| S1- C31                   | 1.668(13) | C11-Ir1-N1        | 80.4(3)   |
| O1- C34                   | 1.207(17) | C22-Ir1-N2        | 80.3(4)   |
| N4- C33                   | 1.445(13) | N3-Ir1-N5         | 75.7(3)   |
| N6- C34                   | 1.333(17) |                   |           |
| <b>[2a]PF<sub>6</sub></b> |           |                   |           |
| Ir1- N3                   | 2.121(13) | N2- Ir1- N1       | 174.4(4)  |
| Ir1- N1                   | 2.032(6)  | C11- Ir1- N3      | 173.2(5)  |
| Ir1- N5                   | 2.186(14) | C22- Ir1- N5      | 173.7(5)  |
| Ir1- N2                   | 2.031(8)  | O1- C35- N6       | 125.1(16) |
| Ir1- C11                  | 2.035(8)  | O1- C35- C34      | 120.5(16) |
| Ir1- C22                  | 2.021(8)  | N6- C35- C34      | 114.4(14) |
| O1- C35                   | 1.22(2)   | C11-Ir1-N1        | 80.0(4)   |
| N4- C34                   | 1.46(2)   | C22-Ir1-N2        | 80.3(4)   |
| N6- C35                   | 1.31(2)   | N3-Ir1-N5         | 75.3(5)   |

**Table SI2. Crystal data and structure refinement for [1a]PF<sub>6</sub> and [2a]PF<sub>6</sub>.**

| Identification code                         | [2a]PF <sub>6</sub> x 0.25H <sub>2</sub> O                                             | [2a]PF <sub>6</sub> x0.5CH <sub>3</sub> OHx0.25H <sub>2</sub> O                         |
|---------------------------------------------|----------------------------------------------------------------------------------------|-----------------------------------------------------------------------------------------|
| Empirical formula                           | C <sub>34</sub> H <sub>26.5</sub> F <sub>6</sub> IrN <sub>6</sub> O <sub>1.25</sub> PS | C <sub>36.5</sub> H <sub>30.5</sub> F <sub>6</sub> IrN <sub>6</sub> O <sub>1.75</sub> P |
| Formula weight                              | 908.34                                                                                 | 918.34                                                                                  |
| Temperature/K                               | 216(2)                                                                                 | 180(2)                                                                                  |
| Wavelength/Å                                | 0.71073                                                                                | 0.71073                                                                                 |
| Crystal system                              | Monoclinic                                                                             | Monoclinic                                                                              |
| Space group                                 | C 2/c                                                                                  | P 2 <sub>1</sub> /c                                                                     |
| a/Å                                         | 20.828(10)                                                                             | 8.7979(12)                                                                              |
| b/Å                                         | 13.963(7)                                                                              | 38.644(6)                                                                               |
| c/Å                                         | 24.739(13)                                                                             | 10.9895(16)                                                                             |
| α/°                                         | 90                                                                                     | 90                                                                                      |
| β/°                                         | 105.879(19)                                                                            | 102.083(4)                                                                              |
| γ/°                                         | 90                                                                                     | 90                                                                                      |
| Volume/Å <sup>3</sup>                       | 6920(6)                                                                                | 3653.5(9)                                                                               |
| Z                                           | 8                                                                                      | 4                                                                                       |
| ρ <sub>calc</sub> /g/cm <sup>3</sup>        | 1.744                                                                                  | 1.670                                                                                   |
| μ/mm <sup>-1</sup>                          | 4.037                                                                                  | 3.770                                                                                   |
| F(000)                                      | 3556                                                                                   | 1806                                                                                    |
| Crystal size/mm <sup>3</sup>                | 0.15 x 0.10 x 0.08                                                                     | 0.08 x 0.06 x 0.01                                                                      |
| Index ranges                                | -24 ≤ h ≤ 24<br>-16 ≤ k ≤ 16<br>-29 ≤ l ≤ 29                                           | -10 ≤ h ≤ 10<br>-45 ≤ k ≤ 45<br>-12 ≤ l ≤ 12                                            |
| Reflections collected                       | 46642                                                                                  | 64453                                                                                   |
| Independent reflections                     | 5822<br>[R(int) = 0.1084]                                                              | 6235<br>[R(int) = 0.1160]                                                               |
| Data/restraints/parameters                  | 5822 / 0 / 429                                                                         | 6235 / 1 / 400                                                                          |
| Goodness-of-fit on F <sup>2</sup>           | 1.071                                                                                  | 1.238                                                                                   |
| Final R indexes [I > 2σ (I)]                | R1 = 0.0634<br>wR2 = 0.1469                                                            | R1 = 0.0943<br>wR2 = 0.2082                                                             |
| Largest diff. peak/hole / e Å <sup>-3</sup> | 1.686 / -2.323                                                                         | 3.581 / -4.797                                                                          |

#### 4.-Photostability of the Iridium complexes

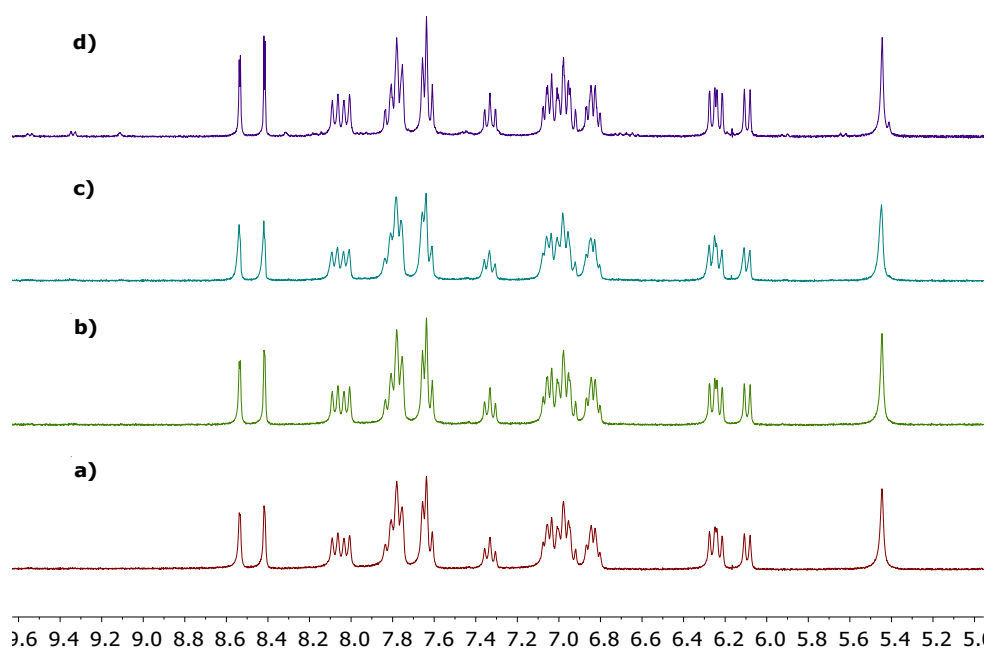

**Figure S127.** Aromatic Area of <sup>1</sup>H NMR (400 MHz) spectra of [1a]Cl in DMSO:Water (3:2) ( $1.4 \cdot 10^{-2}$  M) at 25 °C after irradiation with Blue LED light ( $\lambda=460$  nm): a) t= 0, b) t= 1 h, c) t= 4 h and d) t= 24 h.

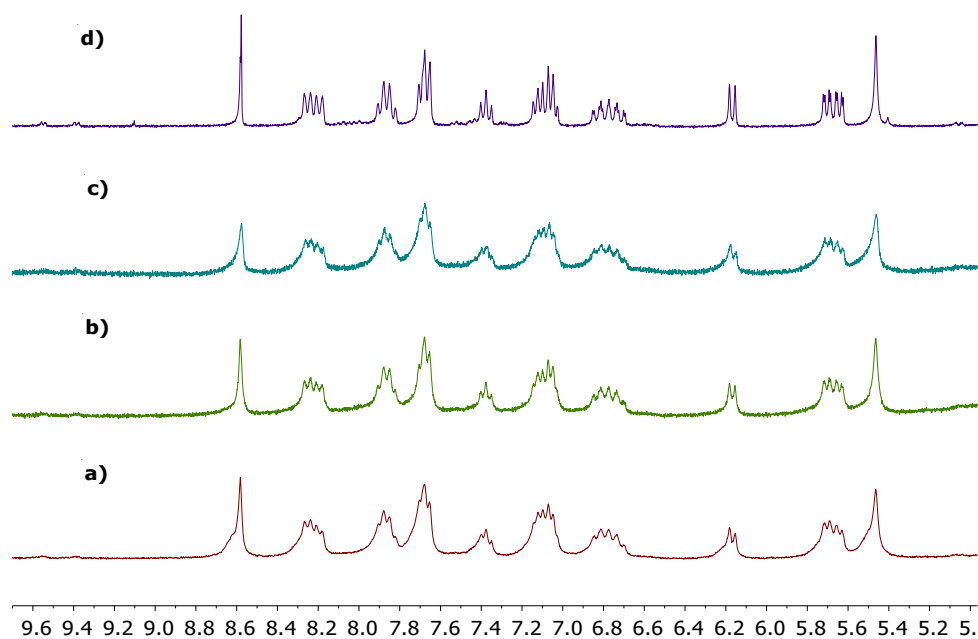

**Figure S128.** Aromatic Area of  $^1\text{H}$  NMR (400 MHz) spectra of **[1b]Cl** in DMSO:Water (3:2) ( $1.4 \cdot 10^{-2}$  M) at 25 °C after irradiation with Blue LED light ( $\lambda=460$  nm): a)  $t=0$ , b)  $t=1$  h, c)  $t=4$  h and d)  $t=24$  h.

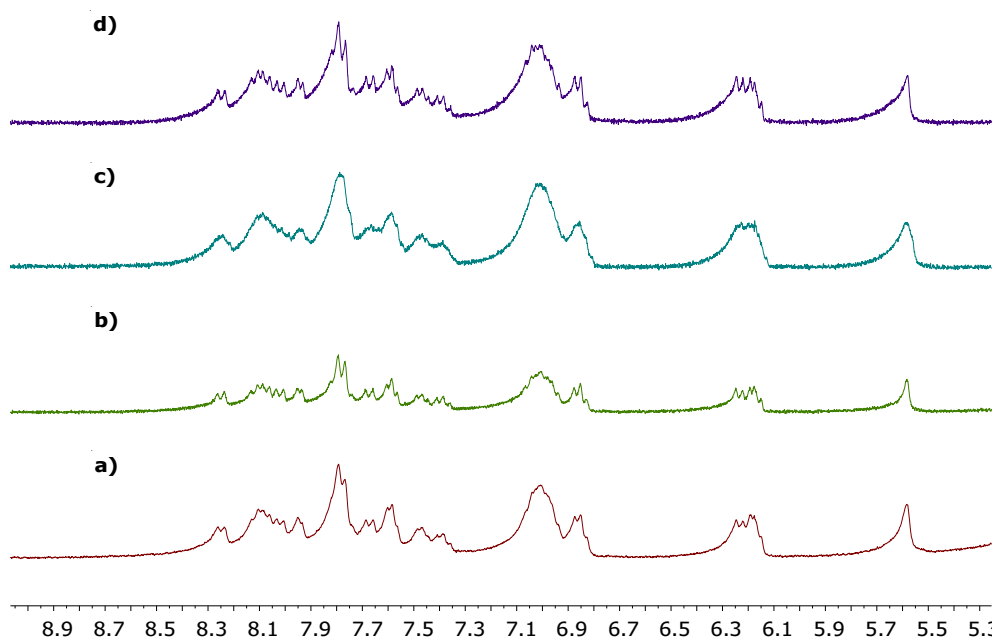

**Figure S129.** Aromatic Area of  $^1\text{H}$  NMR (400 MHz) spectra of **[2a]Cl** in DMSO:Water (3:2) ( $1.4 \cdot 10^{-2}$  M) at 25 °C after irradiation with Blue LED light ( $\lambda=460$  nm): a)  $t=0$ , b)  $t=1$  h, c)  $t=4$  h and d)  $t=24$  h.

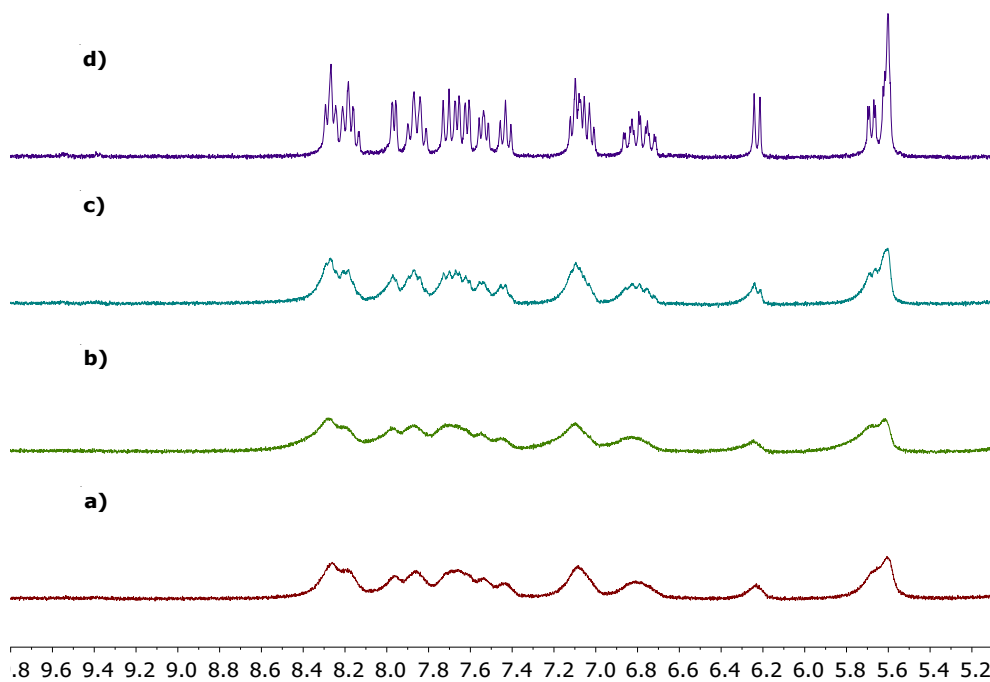

**Figure S130.** Aromatic Area of  $^1\text{H}$  NMR (400 MHz) spectra of **[2b]Cl** in DMSO:Water (3:2) ( $1.4 \cdot 10^{-2}$  M) at 25 °C after irradiation with Blue LED light ( $\lambda=460$  nm): a)  $t=0$ , b)  $t=1$  h, c)  $t=4$  h and d)  $t=24$  h.

### 5. CV of the Ir(III) complexes.

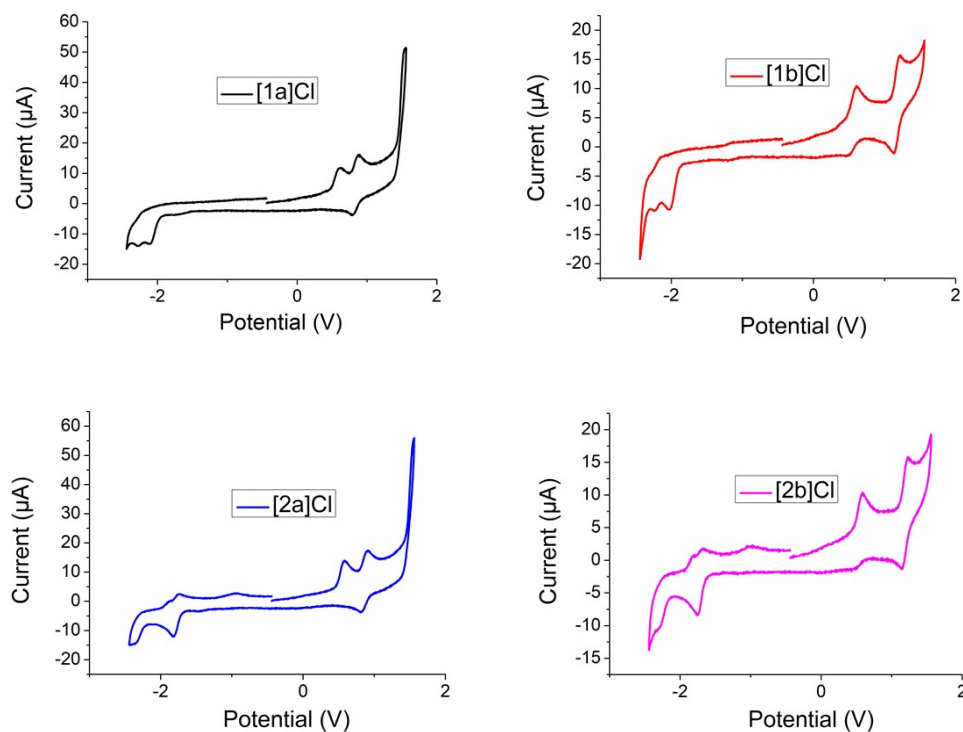

**Figure S131.** Cyclic voltammograms of the iridium complexes.

## 6. UV-Vis spectra

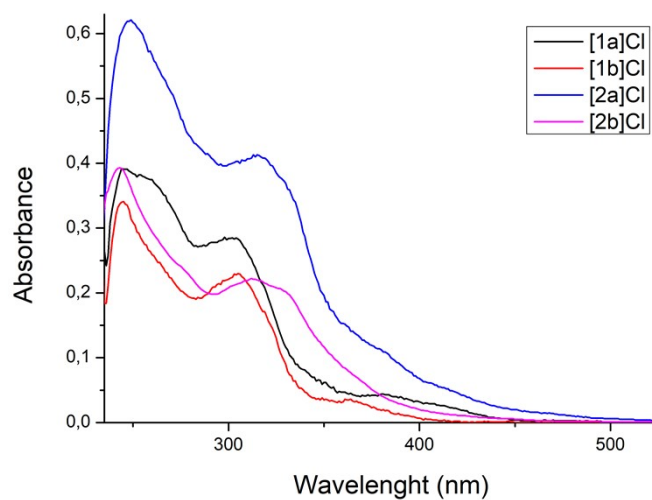

**Figure S132.** Overlaid UV-Vis spectra of complexes [1a]Cl, [1b]Cl, [2a]Cl and [2b]Cl ( $10^{-5}$  M) in DMSO/Water (6:94) at 25 °C.

## 7. Determination of the ability for the generation of $^1\text{O}_2$

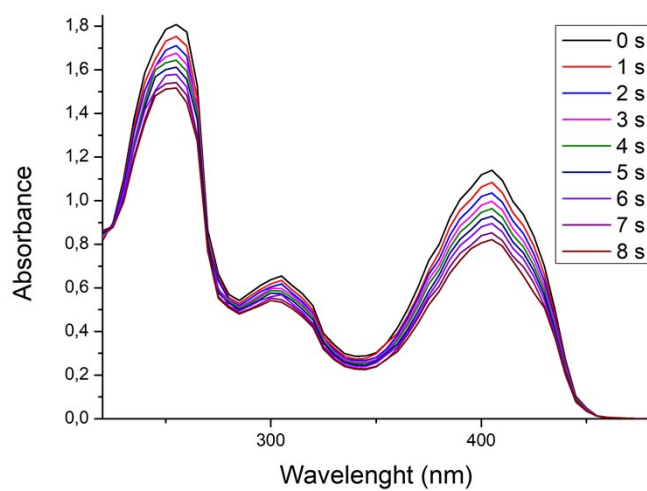

**Figure S133.** Photocatalytic oxidation of DPBF in the presence of [1a]Cl in acetonitrile.

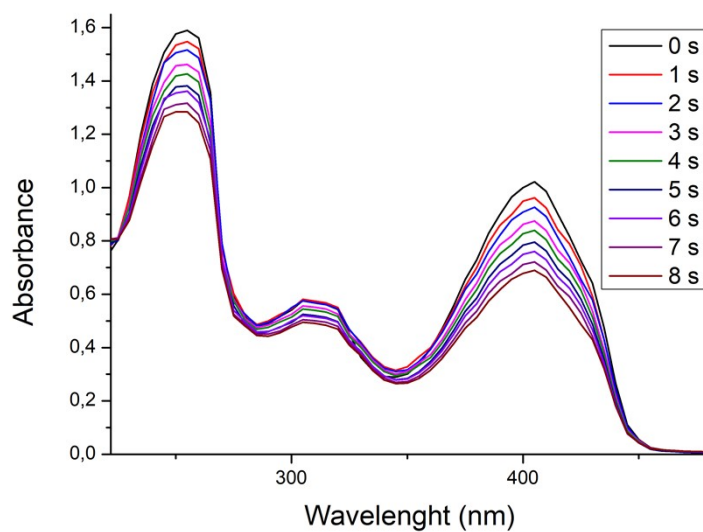

**Figure S134.** Photocatalytic oxidation of DPBF in the presence of **[2a]Cl** in acetonitrile.

### 8. Photo-oxidation of NADH

Control experiments:

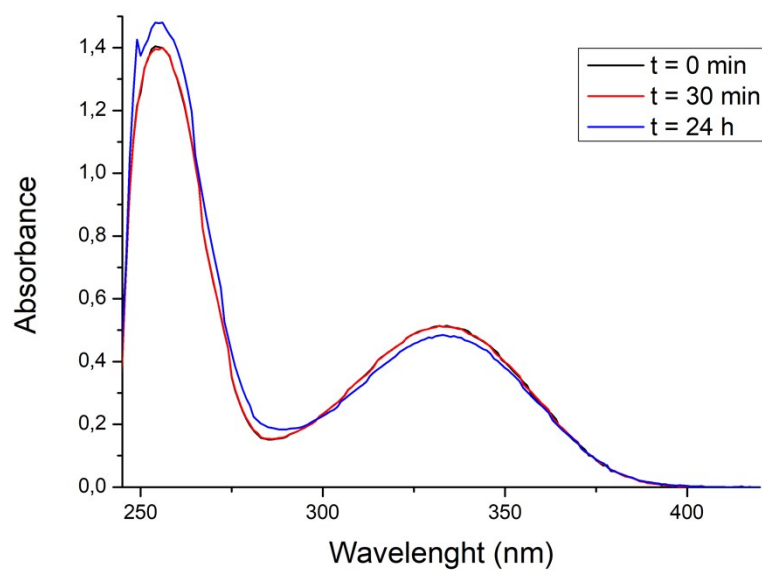

**Figure S135.** UV-vis spectra for the photocatalytic oxidation of NADH (100  $\mu\text{M}$ ) without catalyst in a mixture of  $\text{H}_2\text{O}/\text{MeOH}$  50/50 (v/v) under blue light irradiation (460 nm).



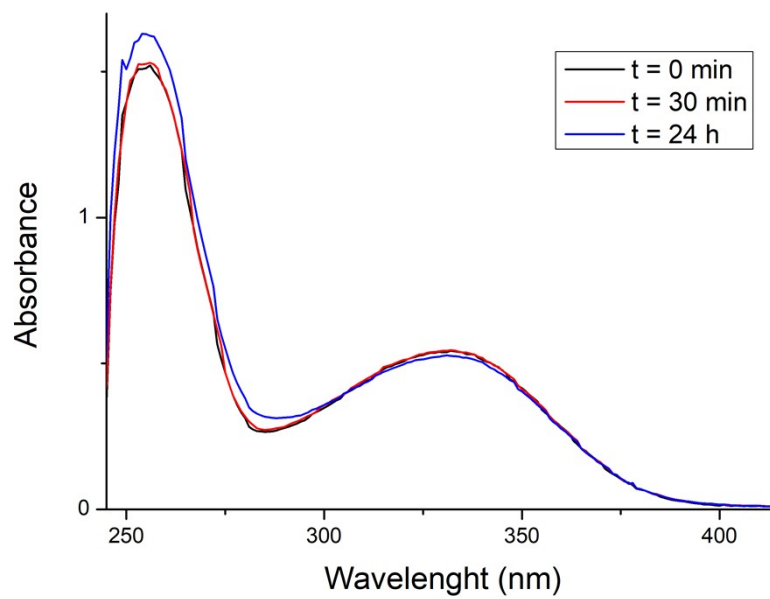

**Figure S136.** UV-vis spectra for the photocatalytic oxidation of NADH (100  $\mu\text{M}$ ) by complex **[1a]Cl** (5  $\mu\text{M}$ ) in a mixture of  $\text{H}_2\text{O}/\text{MeOH}$  50/50 (v/v) in the dark.
